# Supplementary material for: Review of quantitative microbial risk assessments for potable water reuse
Source: Royal Society of Chemistry journal article supplement (doi:10.1039/d4ew00661e), 2025-01-01
Supplement: d4ew00661e1.pdf [file d4ew00661e1.pdf]

*Supplementary Information*

**Review of Quantitative Microbial Risk Assessments for  
Potable Water Reuse**

Emily Clements, Charlotte van der Nagel, Katherine Crank, Deena Hannoun, Daniel Gerrity\*

Southern Nevada Water Authority, P.O. Box 99954, Las Vegas, NV, 89193, USA

\*Corresponding author. Email: [daniel.gerrity@snwa.com](mailto:daniel.gerrity@snwa.com)

**Table S1.** Summary of studies focused on QMRA for potable reuse (listed in alphabetical order by first author; abbreviations summarized in main text).

| Study                               | Target Pathogen                                              | Reuse Type        | QMRA Type | Risk Type                                      | Ingestion Volume & Frequency | GC:IU Ratio; NoV Aggregation                                           | Credited or Actual LRV                                                                                                   | Failure Incorporation                                                                                         | Treatment Train                                                                                                                                                                                                                                                                                                                                                                                 | Sensitivity Analysis                                                                                                                                                                                                                                                                                             | Dose-Response                                                                                                                 | Buffer Storage Time & Decay                                                                       |
|-------------------------------------|--------------------------------------------------------------|-------------------|-----------|------------------------------------------------|------------------------------|------------------------------------------------------------------------|--------------------------------------------------------------------------------------------------------------------------|---------------------------------------------------------------------------------------------------------------|-------------------------------------------------------------------------------------------------------------------------------------------------------------------------------------------------------------------------------------------------------------------------------------------------------------------------------------------------------------------------------------------------|------------------------------------------------------------------------------------------------------------------------------------------------------------------------------------------------------------------------------------------------------------------------------------------------------------------|-------------------------------------------------------------------------------------------------------------------------------|---------------------------------------------------------------------------------------------------|
| Amoueyan et al. (2017) <sup>1</sup> | <i>Crypto</i>                                                | DFR, IPR, and DPR | Bottom up | $10^{-4}$ P <sub>inf</sub> and $10^{-6}$ DALYs | 2 L/d, once daily*           | None                                                                   | Observed treatment performance LRVs                                                                                      | Failure probabilities associated with individual treatment processes and compound failures ('domino effects') | A) DFR: SW-coagulation/flocculation/sedimentation-filtration-disinfection<br>B) IPR: UF-O <sub>3</sub> -BAC-O <sub>3</sub> -environmental buffer<br>C) DPR: UF-O <sub>3</sub> -BAC-UV-ESB                                                                                                                                                                                                       | Considered different WW loadings of <i>Crypto</i> , treatment process failures, reservoir storage time, recycled water contribution, SW temperature, and dose response parameters                                                                                                                                | Exponential                                                                                                                   | Decay incorporated over 270-day baseline storage time                                             |
| Amoueyan et al. (2019) <sup>2</sup> | <i>Crypto</i> , NoV, AdV and <i>Salmonella</i>               | DFR, IPR, and DPR | Bottom up | $10^{-4}$ P <sub>inf</sub> and $10^{-6}$ DALYs | 2 L/d, once daily*           | AdV = 700:1 TCID <sub>50</sub> /gc; NoV mean aggregate size = 1,106 gc | Observed treatment performance LRVs                                                                                      | Failure probabilities associated with individual treatment processes and compound failures ('domino effects') | A) DFR: SW augmentation-DWTP with Cl <sub>2</sub><br>B) MF-RO-UV-GW replenishment-Cl <sub>2</sub><br>C) UF-O <sub>3</sub> -BAC-O <sub>3</sub> -SW augmentation-DWTP with Cl <sub>2</sub><br>D) MF-RO-UV- SW augmentation-DWTP with Cl <sub>2</sub><br>E) MF-RO-UV- SW blending-DWTP with Cl <sub>2</sub><br>F) UF-O <sub>3</sub> -BAC-UV-ESB+Cl <sub>2</sub><br>G) MF-RO-UV-ESB+Cl <sub>2</sub> | Considered increasing concentrations of raw sewage pathogen concentrations (outbreak conditions), storage time and temperature in the environmental buffer, recycled water contributions, treatment process failures, and dose-response model for <i>Crypto</i> risk, aggregated/disaggregated NoV dose-response | <i>Crypto</i> : exponential & Fractional Poisson, AdV: exponential, NoV: Fractional Poisson, <i>Salmonella</i> : Beta Poisson | GW: decay incorporated over 60-day storage time; SW: decay incorporated over 270-day storage time |
| Amoueyan et al. (2020) <sup>3</sup> | NoV                                                          | DFR and DPR       | Bottom up | $10^{-4}$ P <sub>inf</sub>                     | 2 L/d, once daily*           | None; NoV mean aggregate size = 1,106 gc                               | Two different scenarios: observed treatment performance & credited LRVs                                                  | Failure probabilities associated with individual treatment processes and compound failures ('domino effects') | A) DFR: SW augmentation-DWTP<br>B) DPR: MF-RO-UV-ESB+Cl <sub>2</sub><br>C) DPR: UF-O <sub>3</sub> -BAC-UV-ESB+Cl <sub>2</sub>                                                                                                                                                                                                                                                                   | Considered differing storage/travel times (0, 15, and 30 days)                                                                                                                                                                                                                                                   | Fractional Poisson                                                                                                            | Decay incorporated over 270-day baseline storage time                                             |
| Asano et al. (1992) <sup>4</sup>    | Enteric virus (Echovirus 12, Poliovirus 1, and Poliovirus 3) | DFR/IPR           | Bottom up | Did not compare to benchmark                   | 2 L/d, once daily*           | None                                                                   | Directly used tertiary effluent concentrations, or secondary effluent concentrations with LRV = 5 for tertiary treatment | No treatment failure modeled, but did model highest concentration in tertiary treatment with no LRV           | Full treatment = Secondary treatment, coagulation, flocculation, clarification, filtration, disinfection<br>Alternative TT1 = direct filtration (coagulation, flocculation, filtration, disinfection)<br>Alternative TT2 = contact filtration (coagulation, filtration, disinfection)                                                                                                           | Modeled different enteric virus concentrations (secondary or tertiary effluent concentrations)                                                                                                                                                                                                                   | Beta-distributed model; had different infectivities for echovirus 12, poliovirus 1, and poliovirus 3                          | Decay incorporated over 6-month storage time                                                      |

| Study                               | Target Pathogen                                                     | Reuse Type                     | QMRA Type                                              | Risk Type                                                       | Ingestion Volume & Frequency                                                                             | GC:IU Ratio; NoV Aggregation                                                        | Credited or Actual LRV                                                                                                           | Failure Incorporation                                                                                                | Treatment Train                                                                                                                                                                                                                                                                                                                                                                                                                                | Sensitivity Analysis                                                                                                                                                              | Dose-Response                                                                                                                                                                  | Buffer Storage Time & Decay                                                                                                      |
|-------------------------------------|---------------------------------------------------------------------|--------------------------------|--------------------------------------------------------|-----------------------------------------------------------------|----------------------------------------------------------------------------------------------------------|-------------------------------------------------------------------------------------|----------------------------------------------------------------------------------------------------------------------------------|----------------------------------------------------------------------------------------------------------------------|------------------------------------------------------------------------------------------------------------------------------------------------------------------------------------------------------------------------------------------------------------------------------------------------------------------------------------------------------------------------------------------------------------------------------------------------|-----------------------------------------------------------------------------------------------------------------------------------------------------------------------------------|--------------------------------------------------------------------------------------------------------------------------------------------------------------------------------|----------------------------------------------------------------------------------------------------------------------------------|
| Bailey et al. (2020) <sup>5</sup>   | <i>Salmonella</i> spp., AdV, <i>Crypto</i> , and <i>Giardia</i>     | DPR with SW blending (20% DPR) | Bottom up                                              | $10^{-4}$ P <sub>inf</sub>                                      | 2 L/d, once daily*                                                                                       | <i>Salmon.</i> = 1.54:1, AdV = 2.60:1, <i>Crypto</i> = 4:1, <i>Giardia</i> = 7.69:1 | Credited LRV for DW treatment and observed LRVs for worst case reduction scenario                                                | No failure, but included a worst case log <sub>10</sub> reduction scenario for DW treatment based on real-world data | Used EPA, WHO, and observed log <sub>10</sub> reductions for DWTP                                                                                                                                                                                                                                                                                                                                                                              | Rank order correlation in uncertainty (parameter most often associated with high-risk scenarios is microbial concentration—led to most uncertainty)                               | AdV, <i>Crypto</i> , and <i>Giardia</i> : Exponential; <i>Salmonella</i> : Beta-Poisson                                                                                        | Decay incorporated over 5-day storage time                                                                                       |
| Barker et al. (2013) <sup>6</sup>   | NoV, <i>Giardia</i> , and <i>Campy</i>                              | DPR                            | Top down                                               | $10^{-6}$ DALYs                                                 | Lognormal distribution (standard $\mu = 3$ L/d, $\sigma = 1$ L/d, truncated at 2 and 6 L/d), once daily* | None                                                                                | Top down, LRVs calculated based on risk thresholds (6.9/8.0/7.4 for municipal sewage, 12.1/10.4/12.3 for Davis Station outbreak) | Not performed                                                                                                        | Top down, NA                                                                                                                                                                                                                                                                                                                                                                                                                                   | Spearman rank correlation coefficient for each stochastic parameter. Pathogen concentration has largest impact.                                                                   | NoV: Full Beta-Poisson, <i>Giardia</i> : exponential, <i>Campy</i> : Full Beta-Poisson                                                                                         | No decay and no storage time consideration                                                                                       |
| Chaudhry et al. (2017) <sup>7</sup> | NoV, <i>Crypto</i> , and <i>Salmonella</i>                          | DFR and DPR                    | Bottom up                                              | $10^{-4}$ P <sub>inf</sub>                                      | Lognormal distribution (log-normal $\mu = -0.63$ L/d, $\sigma = 0.989$ L/d), once daily                  | None; NoV mean aggregate size = 1,106 gc                                            | Observed treatment performance LRVs                                                                                              | Not performed                                                                                                        | 1) DFR: WW-impacted SW with coagulation, flocculation, sedimentation, media filtration, Cl <sub>2</sub> ; For DPR, raw WW with 2) sedimentation, activated sludge, MF-RO-UV AOP-Cl <sub>2</sub> C) Sedimentation, activated sludge, O <sub>3</sub> -BAC-MF-RO-UV AOP-Cl <sub>2</sub> D) Sedimentation, membrane bioreactor, RO-UV AOP-Cl <sub>2</sub> E) Sedimentation, activated sludge, O <sub>3</sub> -BAC-MF-NF-UV AOP-BAC-Cl <sub>2</sub> | Included different blending ratios for DFR and DPR; modeled aggregated and disaggregated NoV dose-response; used Spearman rank correlation coefficients for DPR treatment trains. | <i>Crypto</i> : exponential; <i>Salmonella</i> : Beta-Poisson; NoV: Fractional Poisson, both aggregated and disaggregated                                                      | No decay and no storage time consideration                                                                                       |
| Church et al. (2015) <sup>8</sup>   | NoV, <i>Salmonella</i> spp. (non-typhi), and <i>E. coli</i> O157:H7 | DPR                            | Top down with pathogen conc. endpoint rather than LRVs | Maximum tolerable cases of illness set to 1 in 50,000 exposures | 3 L/d, once daily*                                                                                       | None                                                                                | Top down, NA                                                                                                                     | Not performed                                                                                                        | Top down, NA                                                                                                                                                                                                                                                                                                                                                                                                                                   | Not performed                                                                                                                                                                     | NoV: hypergeometric based on best-fit parameters for 8fIIa & 8fIIb inocula; <i>Salmonella</i> spp.: approximate Beta-Poisson; <i>E. coli</i> O157:H7: approximate Beta-Poisson | No decay and no storage time consideration, but <i>E. coli</i> decay in the presence of surfactants was characterized separately |

| Study                                 | Target Pathogen                                                           | Reuse Type            | QMRA Type | Risk Type                                                                                                                                     | Ingestion Volume & Frequency                                                                                | GC:IU Ratio; NoV Aggregation                                                                              | Credited or Actual LRV                                                                                        | Failure Incorporation                                                                                                       | Treatment Train                                                                                                                                                                                                                                     | Sensitivity Analysis                                                                                        | Dose-Response                                                                                                                                     | Buffer Storage Time & Decay                |
|---------------------------------------|---------------------------------------------------------------------------|-----------------------|-----------|-----------------------------------------------------------------------------------------------------------------------------------------------|-------------------------------------------------------------------------------------------------------------|-----------------------------------------------------------------------------------------------------------|---------------------------------------------------------------------------------------------------------------|-----------------------------------------------------------------------------------------------------------------------------|-----------------------------------------------------------------------------------------------------------------------------------------------------------------------------------------------------------------------------------------------------|-------------------------------------------------------------------------------------------------------------|---------------------------------------------------------------------------------------------------------------------------------------------------|--------------------------------------------|
| Gerrity et al. (2022) <sup>9</sup>    | Hypothet. enteric virus (SARS-CoV-2 conc. and NoV dose-response function) | General potable reuse | Bottom up | Relative risks determined by dividing the percentile-sorted risk for each scenario by the baseline scenario. Daily, per ingestion, and annual | 2 L/d, 8 ingestion events per day                                                                           | None                                                                                                      | Hypothetical train achieving LRV = 12 for virus (consistent with CA GW reuse)                                 | Not performed                                                                                                               | Hypothetical train achieving LRV = 12                                                                                                                                                                                                               | Not performed                                                                                               | Hypergeometric for NoV                                                                                                                            | No decay and no storage time consideration |
| Gerrity et al. (2023) <sup>10</sup>   | <i>Giardia</i> , <i>Crypto</i> , NoV, EnV, and AdV                        | DPR                   | Top down  | $2.7 \times 10^{-7}$ daily risk benchmark, $10^{-4}$ $P_{inf}$ benchmark                                                                      | 2.5 L/d, once daily                                                                                         | Baseline, GC:IU ratio and culture adjustments were considered; EnV, NoV, and AdV molecular GC: IU = 200:1 | Top down, LRVs were calculated based on risk threshold; Suggested LRTs of 18/15/15 (13/10/10 without failure) | Off-specification conditions were considered for three scenarios of different durations, frequencies, and ingestion events. | Top down, NA                                                                                                                                                                                                                                        | Performed sensitivity analysis on off-specification frequencies, failure duration, and ingestion frequency. | EnV: Beta-Poisson, NoV: hypergeometric, AdV: exact Beta-Poisson, <i>Giardia</i> : exponential, <i>Crypto</i> : Beta-Poisson                       | Top down, no decay, and no storage time    |
| Jones et al. (2023) <sup>11</sup>     | <i>Crypto</i> , <i>Giardia</i> , <i>Campy</i> , EnV, and AdV              | IPR**                 | Bottom up | $10^{-4}$ $P_{inf}$ and $10^{-6}$ DALYs                                                                                                       | Lognormal distribution (standard $\mu=1.948$ L/d, $\sigma=0.827$ L/d) 1, 8, and 96 ingestion events per day | None                                                                                                      | Credited LRV                                                                                                  | Failure scenarios = No failure, real failure (literature), and total failure                                                | MF-RO-UV AOP-ESB                                                                                                                                                                                                                                    | Analyzed scenarios with different failure, consumption, and use of an ESB                                   | <i>Crypto</i> , <i>Campy</i> and enterovirus: Beta-Poisson (used rotavirus DR model for enterovirus); adenovirus and <i>Giardia</i> : exponential | No decay and no storage time consideration |
| Kimbell et al. (2024) <sup>12</sup>   | AdV, enteric viruses, <i>Crypto</i> , <i>Giardia</i>                      | IPR**                 | Bottom up | $2.7 \times 10^{-7}$ daily risk, $10^{-4}$ $P_{inf}$                                                                                          | 2.5 L/d, 96 ingestion events per day                                                                        | None                                                                                                      | Credit LRV                                                                                                    | 3-log reduction in treatment for 24 h 9% of simulated days; 6-log reduction in treatment for 24 h 1% of simulated days      | A) BNR-MBR-RO-UV AOP-Cl <sub>2</sub> -O <sub>3</sub><br>B) BNR-MF/UF-CF-RO-UV AOP-Cl <sub>2</sub> -O <sub>3</sub>                                                                                                                                   | Compared different LRVs and failure incorporations                                                          | Enteric virus: Beta-poisson, AdV: exponential, <i>Giardia</i> : exponential, <i>Crypto</i> : exponential                                          | No decay and no storage time consideration |
| Kobayashi et al. (2015) <sup>13</sup> | <i>Crypto</i> , <i>Campy</i> , rotavirus                                  | DFR                   | Bottom up | $10^{-6}$ DALYs                                                                                                                               | 0.75 L/d, once daily*                                                                                       | None                                                                                                      | Observed treatment performance LRVs                                                                           | Not performed                                                                                                               | Used WWTP effluent concentration data, had a scenario with and without an additional advanced water treatment plant. A) DWTP: includes dissolved air floatation, rapid sand filtration, and Cl <sub>2</sub><br>B) Advanced Water Treatment prior to | Not performed                                                                                               | <i>Crypto</i> , <i>Campy</i> and rotavirus: Beta-Poisson                                                                                          | Incorporated decay with the travel times   |

| Study                                    | Target Pathogen                             | Reuse Type    | QMRA Type                          | Risk Type                                                    | Ingestion Volume & Frequency | GC:IU Ratio; NoV Aggregation | Credited or Actual LRV                                                                                        | Failure Incorporation | Treatment Train                                                                                                                                                                                                                                                                                                                                                                     | Sensitivity Analysis                                                                                                                                           | Dose-Response                                                                               | Buffer Storage Time & Decay                                              |
|------------------------------------------|---------------------------------------------|---------------|------------------------------------|--------------------------------------------------------------|------------------------------|------------------------------|---------------------------------------------------------------------------------------------------------------|-----------------------|-------------------------------------------------------------------------------------------------------------------------------------------------------------------------------------------------------------------------------------------------------------------------------------------------------------------------------------------------------------------------------------|----------------------------------------------------------------------------------------------------------------------------------------------------------------|---------------------------------------------------------------------------------------------|--------------------------------------------------------------------------|
|                                          |                                             |               |                                    |                                                              |                              |                              |                                                                                                               |                       | discharge: strainer-µF-chemical dosing-RO-pH adjustment-recarbonation-Cl <sub>2</sub> -dechlorination, then the same DWTP                                                                                                                                                                                                                                                           |                                                                                                                                                                |                                                                                             |                                                                          |
| Lim et al. (2017) <sup>14</sup>          | <i>Crypto</i> and NoV                       | DFR           | Bottom up                          | 10 <sup>-4</sup> P <sub>inf</sub> and 10 <sup>-6</sup> DALYs | 2 L/d, once daily*           | None                         | Credited LRV = 3 for <i>Crypto</i> and LRV = 4 for NoV in DWTP                                                | Not performed         | TT for DWTP not specified, used LRVs of 3 for <i>Crypto</i> and 4 for NoV                                                                                                                                                                                                                                                                                                           | Three different retention times (270, 15, and 360 days) and three dilutions rates (15%, 30%, 45%)                                                              | <i>Crypto</i> : fractional Poisson; NoV non-aggregated: exact Beta-Poisson (hypergeometric) | Decay incorporated over 270, 315, and 360-day storage time               |
| MacNevin and Zornes (2020) <sup>15</sup> | <i>Crypto</i> and <i>Giardia</i>            | DPR           | Iterative Bottom up to get LRV min | 10 <sup>-4</sup> P <sub>inf</sub>                            | 2 L/d, once daily*           | None                         | Started at LRV = 4 then increased by 0.5 until the simulated risk was less than 1 in 10,000                   | Not performed         | Chose the LRVs                                                                                                                                                                                                                                                                                                                                                                      | Not performed                                                                                                                                                  | Exponential                                                                                 | No decay and no storage time consideration                               |
| Page et al. (2010a) <sup>16</sup>        | Rotavirus, <i>Crypto</i> , and <i>Campy</i> | IPR           | Bottom up                          | 10 <sup>-6</sup> DALYs                                       | 2 L/d, once daily*           | None                         | LRVs from Australian guidelines for water recycling + capped LRV for aquifer                                  | Not performed         | Stormwater-wetland--aquifer- post treatment (UV, Cl <sub>2</sub> )                                                                                                                                                                                                                                                                                                                  | A factor sensitivity was calculated for each barrier in the treatment train (wetland, aquifer, UV and Cl <sub>2</sub> ) to determine relative value of aquifer | Rotavirus: Beta-Poisson; <i>Campy</i> : Beta-Poisson; <i>Crypto</i> : exponential           | Decay incorporated over 241±58 day (lognormal distribution) storage time |
| Page et al. (2010b) <sup>17</sup>        | Rotavirus, <i>Crypto</i> , and <i>Campy</i> | IPR           | Bottom up                          | 10 <sup>-6</sup> DALYs                                       | Not reported                 | None                         | Used pathogen decay information to calculate the time for a 1-log <sub>10</sub> reduction in pathogen numbers | Not performed         | Stormwater-wetland--aquifer- post treatment (UV, Cl <sub>2</sub> )                                                                                                                                                                                                                                                                                                                  | Not performed                                                                                                                                                  | Rotavirus: Beta-Poisson, <i>Crypto</i> : Beta-Poisson, <i>Campy</i> : not specified         | Decay incorporated over a 240 day residence time                         |
| Page et al. (2010c) <sup>18</sup>        | Rotavirus, <i>Crypto</i> , and <i>Campy</i> | IPR           | Bottom up                          | 10 <sup>-6</sup> DALYs                                       | Not reported                 | None                         | Actual LRVs for aquifer and engineered treatment                                                              | Not performed         | A) Primary Treatment – aquifer – post-treatment (Cl <sub>2</sub> )<br>B) Secondary treated (activated sludge) WW + stormwater – wetland – aquifer – post-treatment (water softening, Cl <sub>2</sub> )<br>C) Tertiary Treated WW (RO) – aquifer – post-treatment (aeration, rapid sand filtration, UV)<br>D) Stormwater – wetland – aquifer – post-treatment (UV, Cl <sub>2</sub> ) | A sensitivity analysis was performed for each barrier in the treatment train for each case study site.                                                         | Rotavirus: Beta-Poisson, <i>Crypto</i> : Beta-Poisson, <i>Campy</i> : not specified         | Decay incorporated for each case study storage time (20-730 days)        |
| Page et al. (2015a) <sup>19</sup>        | AdV, <i>Crypto</i> , and <i>Campy</i>       | General reuse | Top down                           | 10 <sup>-6</sup> DALYs                                       | 2 L/d, once daily            | AdV = 100:1                  | NA, top down, found LRT = 5.8 for                                                                             | Not performed         | NA, top down                                                                                                                                                                                                                                                                                                                                                                        | Not performed                                                                                                                                                  | Dose equivalent to 10 <sup>-6</sup> DALYs used for each                                     | No decay and no storage time consideration                               |

| Study                              | Target Pathogen                               | Reuse Type | QMRA Type                                   | Risk Type                                                    | Ingestion Volume & Frequency                                                     | GC:IU Ratio; NoV Aggregation                                                      | Credited or Actual LRV                                                             | Failure Incorporation                                                                | Treatment Train                                                                                                                                                                                                                                                                                                                                                                                                                                                                                                    | Sensitivity Analysis                                                                                           | Dose-Response                                                                                                                                                                                               | Buffer Storage Time & Decay                                                |
|------------------------------------|-----------------------------------------------|------------|---------------------------------------------|--------------------------------------------------------------|----------------------------------------------------------------------------------|-----------------------------------------------------------------------------------|------------------------------------------------------------------------------------|--------------------------------------------------------------------------------------|--------------------------------------------------------------------------------------------------------------------------------------------------------------------------------------------------------------------------------------------------------------------------------------------------------------------------------------------------------------------------------------------------------------------------------------------------------------------------------------------------------------------|----------------------------------------------------------------------------------------------------------------|-------------------------------------------------------------------------------------------------------------------------------------------------------------------------------------------------------------|----------------------------------------------------------------------------|
|                                    |                                               |            |                                             |                                                              |                                                                                  |                                                                                   | rotavirus, 4.8 for <i>Crypto</i> , and 5.3 for <i>Campy</i> to meet health targets |                                                                                      |                                                                                                                                                                                                                                                                                                                                                                                                                                                                                                                    |                                                                                                                | pathogen: rotavirus (used for AdV) = $2.5 \times 10^{-3}$ n/year; <i>Crypto</i> = $1.6 \times 10^{-2}$ n/year; <i>Campy</i> = $3.8 \times 10^{-2}$ n/year.                                                  |                                                                            |
| Page et al. (2015b) <sup>20</sup>  | AdV, <i>Crypto</i> , <i>Campy</i>             | IPR        | Top down with comparison to treatment train | $10^{-6}$ DALYs                                              | 2 L/d, once daily*                                                               | None                                                                              | LRVs from attachment and decay rates                                               | Not performed                                                                        | A) Storage Transfer and Recovery (ASTR, uses separate recharge and recovery wells)<br>B) Aquifer Storage and Recovery (ASR, uses one well for recharge and recovery)                                                                                                                                                                                                                                                                                                                                               | Not performed                                                                                                  | Dose equivalent to $10^{-6}$ DALYs used for each pathogen: rotavirus (used for AdV) = $2.5 \times 10^{-3}$ n/year; <i>Crypto</i> = $1.6 \times 10^{-2}$ n/year; <i>Campy</i> = $3.8 \times 10^{-2}$ n/year. | Decay incorporated over 250-days storage time for ASTR and 25-days for ASR |
| Page et al. (2016) <sup>21</sup>   | Rotavirus, <i>Crypto</i> , and <i>Campy</i>   | IPR        | Top down with comparison to treatment train | $10^{-6}$ DALYs                                              | 2 L/d, once daily                                                                | None                                                                              | LRVs from Australian drinking water guidelines                                     | None                                                                                 | A) Stormwater catchment-pretreatment-aquifer-final treatment (UV, Cl <sub>2</sub> )<br>B) Stormwater catchment-pretreatment-reservoir-final treatment (coagulation and dual media filtration, UV, Cl <sub>2</sub> )<br>C) Stormwater catchment-pretreatment-aquifer-reservoir-final treatment (coagulation and dual media filtration, Cl <sub>2</sub> )<br>D) Stormwater catchment-pretreatment-aquifer-intermediate treatment-reservoir-final treatment (coagulation and dual media filtration, Cl <sub>2</sub> ) | None                                                                                                           | Dose equivalent to $10^{-6}$ DALYs used for each pathogen: rotavirus (used for AdV) = $2.5 \times 10^{-3}$ n/year; <i>Crypto</i> = $1.6 \times 10^{-2}$ n/year; <i>Campy</i> = $3.8 \times 10^{-2}$ n/year. | Decay incorporated over 250-days storage time in aquifer                   |
| Pecson et al. (2017) <sup>22</sup> | EnV and <i>Crypto</i>                         | DPR        | Bottom up                                   | $10^{-4}$ and $10^{-3}$ P <sub>inf</sub> and $10^{-6}$ DALYs | Lognormal distribution with median of 1.8 L/d, ingested over 96 15-min intervals | None                                                                              | Observed LRV = 14.1 (+6 for free Cl <sub>2</sub> ) for EnV, 16.0 for <i>Crypto</i> | Each process was modeled with one failure per year lasting 15 min, 1 h, 8 h, or 24 h | O <sub>3</sub> -BAC-MF/UF-RO-UV AOP                                                                                                                                                                                                                                                                                                                                                                                                                                                                                | Sensitivity analysis on volume of water consumed and impact of different <i>Crypto</i> dose-response functions | Dose-response for enterovirus used rotavirus model using a Beta-Poisson; <i>Crypto</i> : Beta-Poisson                                                                                                       | No decay and no storage time consideration                                 |
| Pecson et al. (2023) <sup>23</sup> | <i>Giardia</i> , <i>Crypto</i> , NoV, and EnV | DPR        | Top down                                    | $2.7 \times 10^{-7}$ daily risk, $10^{-4}$ P <sub>inf</sub>  | 2 L/d, 96 ingestion events per day                                               | EnV = 1:1 to 10,000:1; AdV = 1:1 to 100,000:1; NoV mean aggregate size = 1,106 gc | NA, top down, suggested LRTs of 17/14/14 (13/10/10 without failure)                | Suggested a 4-log redundancy to protect against failures                             | Top down, NA                                                                                                                                                                                                                                                                                                                                                                                                                                                                                                       | Used two different NoV dose-response functions                                                                 | NoV (GI): hypergeometric; NoV (GI and GII.4) Fractional Poisson; <i>Giardia</i> : exponential; <i>Crypto</i> : Beta-Poisson;                                                                                | Top down, no decay and no storage time                                     |

| Study                               | Target Pathogen                                                                                             | Reuse Type | QMRA Type              | Risk Type                         | Ingestion Volume & Frequency                     | GC:IU Ratio; NoV Aggregation | Credited or Actual LRV                                                                                                                       | Failure Incorporation | Treatment Train                                                                                                                                                                                                                                                    | Sensitivity Analysis                                                                                                                                                     | Dose-Response                                                                                                                                                                                                                                                  | Buffer Storage Time & Decay                |
|-------------------------------------|-------------------------------------------------------------------------------------------------------------|------------|------------------------|-----------------------------------|--------------------------------------------------|------------------------------|----------------------------------------------------------------------------------------------------------------------------------------------|-----------------------|--------------------------------------------------------------------------------------------------------------------------------------------------------------------------------------------------------------------------------------------------------------------|--------------------------------------------------------------------------------------------------------------------------------------------------------------------------|----------------------------------------------------------------------------------------------------------------------------------------------------------------------------------------------------------------------------------------------------------------|--------------------------------------------|
|                                     |                                                                                                             |            |                        |                                   |                                                  |                              |                                                                                                                                              |                       |                                                                                                                                                                                                                                                                    |                                                                                                                                                                          | rotavirus: approximate Beta-Poisson (used it with the enterovirus occurrence data)                                                                                                                                                                             |                                            |
| Remy et al. (2019) <sup>24</sup>    | Rotavirus, <i>Campy jejuni</i> , <i>Crypto parvum</i> , <i>Giardia intestinalis</i>                         | IPR**      | Bottom up              | 10 <sup>-6</sup> DALYs            | Triangular distribution from 1-2 L/d, once daily | None                         | Credited (DWT, WWT) and observed (tertiary treatment) LRVs used                                                                              | Not performed         | A) WWTP-Filter-EDR-μGAC-UV-DWTP<br>B) WWTP-UF-RO with 5% bypass-DWTP                                                                                                                                                                                               | Not performed                                                                                                                                                            | <i>Giardia</i> : exponential<br><i>Campy</i> : Beta-Poisson<br><i>Crypto</i> : exponential<br>Rotavirus: Beta-Poisson                                                                                                                                          | No decay and no storage time consideration |
| Seis et al. (2020) <sup>25</sup>    | NoV                                                                                                         | IPR        | Top down               | 10 <sup>-4</sup> P <sub>inf</sub> | 1 L/d, once daily*                               | None                         | Hypothetical train achieving LRV = 12-16                                                                                                     | Not performed         | Hypothetical train achieving LRV = 12-16                                                                                                                                                                                                                           | Not performed                                                                                                                                                            | Hypergeometric (disaggregated)                                                                                                                                                                                                                                 | Top down, no decay, and no storage time    |
| Soller et al. (2017a) <sup>26</sup> | NoV, AdV, <i>Crypto</i> spp., <i>Giardia lamblia</i> , <i>Campy jejuni</i> , and <i>Salmonella enterica</i> | DPR        | Bottom up              | 10 <sup>-4</sup> P <sub>inf</sub> | 2.5 L/d, once daily*                             | None                         | Observed LRVs from literature                                                                                                                | Not performed         | A) MF-RO-UV-ESB+Cl <sub>2</sub><br>B) O <sub>3</sub> -BAF-MF-RO-UV<br>C) O <sub>3</sub> -BAF-UF-UV-ESB+Cl <sub>2</sub><br>D) O <sub>3</sub> -BAF-UF-UV-ESB+Cl <sub>2</sub> -conventional DWTP (coagulation/flocculation/sedimentation-filtration-Cl <sub>2</sub> ) | Used two UV doses (12 and 800 mJ/cm <sup>2</sup> ) and two dose-response models for NoV and <i>Crypto</i>                                                                | AdV: exponential;<br><i>Campy</i> : hypergeometric;<br><i>Crypto</i> : exponential and Fractional Poisson;<br><i>Giardia</i> : exponential;<br>NoV: hypergeometric and Fractional Poisson;<br><i>Salmonella</i> : Beta-Poisson                                 | No decay and no storage time consideration |
| Soller et al. (2018) <sup>27</sup>  | NoV, AdV, <i>Crypto</i> , <i>Giardia lamblia</i> , <i>Campy</i> spp., and <i>Salmonella enterica</i>        | DPR        | Bottom up and top down | 10 <sup>-4</sup> P <sub>inf</sub> | 2.5 L/d, once daily*                             | None                         | Credited LRVs and calculated LRVs necessary for 10 <sup>-4</sup> P <sub>inf</sub> for 95% (14/11/11) and 100% scenario compliance (15/11/11) | Not performed         | A) MF-RO-UV-ESB+Cl <sub>2</sub> ;<br>B) O <sub>3</sub> -BAF-UF-UV-ESB+Cl <sub>2</sub>                                                                                                                                                                              | Used different NoV concentrations in raw wastewater; used different dose-response models for AdV, NoV, and <i>Crypto</i> ; two UV doses (12 and 800 mJ/cm <sup>2</sup> ) | AdV: exponential and hypergeometric;<br><i>Campy</i> : hypergeometric;<br><i>Crypto</i> : exponential and Fractional Poisson and exponential with immunity;<br><i>Giardia</i> : exponential;<br>NoV: hypergeometric and Fractional Poisson and weighted model; | No decay and no storage time consideration |

| Study                                 | Target Pathogen                         | Reuse Type      | QMRA Type | Risk Type                         | Ingestion Volume & Frequency                                              | GC:IU Ratio; NoV Aggregation | Credited or Actual LRV                           | Failure Incorporation                                                                                                                                                                                  | Treatment Train                                                                                                                                                                                                                                                                                                                             | Sensitivity Analysis                                                                                                                                                                                                                                                            | Dose-Response                                                                                                                                                           | Buffer Storage Time & Decay                                                                                                                   |
|---------------------------------------|-----------------------------------------|-----------------|-----------|-----------------------------------|---------------------------------------------------------------------------|------------------------------|--------------------------------------------------|--------------------------------------------------------------------------------------------------------------------------------------------------------------------------------------------------------|---------------------------------------------------------------------------------------------------------------------------------------------------------------------------------------------------------------------------------------------------------------------------------------------------------------------------------------------|---------------------------------------------------------------------------------------------------------------------------------------------------------------------------------------------------------------------------------------------------------------------------------|-------------------------------------------------------------------------------------------------------------------------------------------------------------------------|-----------------------------------------------------------------------------------------------------------------------------------------------|
|                                       |                                         |                 |           |                                   |                                                                           |                              |                                                  |                                                                                                                                                                                                        |                                                                                                                                                                                                                                                                                                                                             |                                                                                                                                                                                                                                                                                 | <i>Salmonella</i> : Beta-Poisson                                                                                                                                        |                                                                                                                                               |
| Soller et al. (2019) <sup>28</sup>    | NoV, <i>Crypto</i> , and <i>Giardia</i> | DFR IPR and DPR | Bottom up | 10 <sup>-4</sup> P <sub>inf</sub> | 2.5 L/d, once daily*                                                      | None                         | Observed LRVs from literature                    | Not performed                                                                                                                                                                                          | A) (for IPR—all were used for DPR): MF-RO-UV-ESB+Cl <sub>2</sub> ; B) O <sub>3</sub> -BAF-MF-RO-UV; C) O <sub>3</sub> -BAF-UF-UV-ESB+Cl <sub>2</sub> ; D) O <sub>3</sub> -BAF-UF-UV-ESB+Cl <sub>2</sub> -conventional DWTP (flocculation/sedimentation-filtration-Cl <sub>2</sub> )                                                         | DPR TTs compared two UV doses (12 and 800 mJ/cm <sup>2</sup> ), two dose-response models for NoV, different retention times and recycled water contributions for IPR and DFR.                                                                                                   | <i>Crypto</i> : exponential with immunity; <i>Giardia</i> : exponential; NoV: weighted model based on hypergeometric and Fractional Poisson with aggregation models     | DFR: Decay incorporated over 2, 15, 30, 90, 180, and 360-day storage time. IPR: Decay incorporated over 30, 90, 180, and 360-day storage time |
| Tanaka et al. (1998) <sup>29</sup>    | Enteric virus                           | DFR/IPR         | Bottom up | 10 <sup>-4</sup> P <sub>inf</sub> | 2 L/d, once daily*                                                        | None                         | LRVs from a previous study for different trains  | Not performed                                                                                                                                                                                          | A) Secondary treatment, coagulation, flocculation, sedimentation, filtration, disinfection with high Cl <sub>2</sub> (LRV = 5.2) B) direct Cl <sub>2</sub> of secondary effluent (LRV = 3.9) C) Secondary treatment, coagulation, filtration, disinfection with low Cl <sub>2</sub> (LRV = 4.7) D) unchlorinated second. effluent (LRV = 0) | Used virus concentrations from different California treatment facilities, two different decay rate constants, and compared four different treatment trains                                                                                                                      | Used two dose-response models: Single-hit exponential model and beta-distributed probability model                                                                      | Decay incorporated over 6-month storage time                                                                                                  |
| Zhiteneva et al. (2021) <sup>30</sup> | NoV, <i>Campy</i> and <i>Crypto</i>     | IPR             | Bottom up | 10 <sup>-6</sup> DALYs            | Lognormal distribution (log-normal μ= 0.65 L/d, σ= 0.53 L/d), once daily* | None                         | Observed treatment performance and credited LRVs | In the Bayesian network, the failure of each treatment step (LRV = 0) was assessed with selector nodes; created a model where the performance of one LRV node was correlated by 0.5 to other LRV nodes | Biological treatment, rapid sand filtration, sand biofilter, GAC, UV, GW recharge, DW treatment                                                                                                                                                                                                                                             | Sensitivity analysis to see which parameters exerted the most influence on the final risk; also did a high pathogen loading event, a performance failure of the sand biofilter, managed aquifer recharge failure, experimental NoV removal, and the effect of the common factor | <i>Campy</i> : Approximate Beta-Poisson and exact Beta-Poisson; <i>Crypto</i> : exponential and Fractional Poisson NoV: approximate Beta-Poisson and Fractional Poisson | Decay incorporated between 50 and 120-day storage time                                                                                        |

\* Not reported, assuming one ingestion event per day

\*\* Authors reported study as IPR, but neglect the environmental buffer, so the risk simulation was identical to DPR



## References

- 1 E. Amoueyan, S. Ahmad, J. N. S. Eisenberg, B. Pecson and D. Gerrity, Quantifying pathogen risks associated with potable reuse: A risk assessment case study for *Cryptosporidium*, *Water Research*, 2017, **119**, 252–266.
- 2 E. Amoueyan, S. Ahmad, J. N. S. Eisenberg and D. Gerrity, Equivalency of indirect and direct potable reuse paradigms based on a quantitative microbial risk assessment framework, *Microbial Risk Analysis*, 2019, **12**, 60–75.
- 3 E. Amoueyan, S. Ahmad, J. N. S. Eisenberg and D. Gerrity, A dynamic quantitative microbial risk assessment for norovirus in potable reuse systems, *Microbial Risk Analysis*, 2020, **14**, 100088.
- 4 T. Asano, L. Y. C. Leong, M. G. Rigby and R. H. Sakaji, Evaluation of the California Wastewater Reclamation Criteria Using Enteric Virus Monitoring Data, *Water Science and Technology*, 1992, **26**, 1513–1524.
- 5 E. S. Bailey, L. M. Casanova and M. D. Sobsey, Quantitative microbial risk assessment of North Carolina reclaimed water for potable reuse, *AWWA Water Science*, 2020, **2**, e1200.
- 6 S. F. Barker, M. Packer, P. J. Scales, S. Gray, I. Snape and A. J. Hamilton, Pathogen reduction requirements for direct potable reuse in Antarctica: evaluating human health risks in small communities, *Sci Total Environ*, 2013, **461–462**, 723–733.
- 7 R. M. Chaudhry, K. A. Hamilton, C. N. Haas and K. L. Nelson, Drivers of Microbial Risk for Direct Potable Reuse and de Facto Reuse Treatment Schemes: The Impacts of Source Water Quality and Blending, *International Journal of Environmental Research and Public Health*, 2017, **14**, 635.
- 8 J. Church, M. E. Verbyla, W. H. Lee, A. A. Randall, T. J. Amundsen and D. J. Zastrow, Dishwashing water recycling system and related water quality standards for military use, *Science of The Total Environment*, 2015, **529**, 275–284.
- 9 D. Gerrity, K. Papp and B. M. Pecson, Pathogen Peak “Averaging” in Potable Reuse Systems: Lessons Learned from Wastewater Surveillance of SARS-CoV-2, *ACS EST Water*, 2022, **2**, 1863–1870.
- 10 D. Gerrity, K. Crank, E. Steinle-Darling and B. M. Pecson, Establishing pathogen log reduction value targets for direct potable reuse in the United States, *AWWA Water Science*, 2023, **5**, e1353.
- 11 C. H. Jones, V. Wylie, H. Ford, J. Fawell, M. Holmer and K. Bell, A robust scenario analysis approach to water recycling quantitative microbial risk assessment, *Journal of Applied Microbiology*, 2023, **134**, lxad029.
- 12 L. K. Kimbell, F. Sabba, G. Hunter and L. Botero, Comparison of treatment trains for indirect potable reuse and use of quantitative microbial risk assessment (QMRA) to evaluate reliability of pathogen removal: Zoo Miami case study, *Journal of Water Process Engineering*, 2024, **65**, 105850.
- 13 Y. Kobayashi, G. M. Peters, N. J. Ashbolt, S. Heimersson, M. Svanström and S. J. Khan, Global and local health burden trade-off through the hybridisation of quantitative microbial risk assessment and life cycle assessment to aid water management, *Water Research*, 2015, **79**, 26–38.
- 14 K.-Y. Lim, Y. Wu and S. C. Jiang, Assessment of *Cryptosporidium* and norovirus risk associated with de facto wastewater reuse in Trinity River, Texas, *Microbial Risk Analysis*, 2017, **5**, 15–24.

- 15D. MacNevin and G. Zornes, Health risks from protozoa in potable reuse: Implications of Florida's data set, *AWWA Water Science*, 2020, **2**, e1199.
- 16D. Page, P. Dillon, S. Toze and J. P. S. Sidhu, Characterising aquifer treatment for pathogens in managed aquifer recharge, *Water Science and Technology*, 2010, **62**, 2009–2015.
- 17D. Page, P. Dillon, J. Vanderzalm, S. Toze, J. Sidhu, K. Barry, K. Levett, S. Kremer and R. Regel, Risk Assessment of Aquifer Storage Transfer and Recovery with Urban Stormwater for Producing Water of a Potable Quality, *Journal of Environmental Quality*, 2010, **39**, 2029–2039.
- 18D. Page, P. Dillon, S. Toze, D. Bixio, B. Genthe, B. E. Jiménez Cisneros and T. Wintgens, Valuing the subsurface pathogen treatment barrier in water recycling via aquifers for drinking supplies, *Water Research*, 2010, **44**, 1841–1852.
- 19D. W. Page, K. Barry, D. Gonzalez, A. Keegan and P. Dillon, Reference pathogen numbers in urban stormwater for drinking water risk assessment, *Journal of Water Reuse and Desalination*, 2015, **6**, 30–39.
- 20D. Page, D. Gonzalez, S. Torkzaban, S. Toze, J. Sidhu, K. Miotliński, K. Barry and P. Dillon, Microbiological risks of recycling urban stormwater via aquifers for various uses in Adelaide, Australia, *Environ Earth Sci*, 2015, **73**, 7733–7737.
- 21D. Page, D. Gonzalez, J. Sidhu, S. Toze, S. Torkzaban and P. Dillon, Assessment of treatment options of recycling urban stormwater recycling via aquifers to produce drinking water quality, *Urban Water Journal*, 2016, **13**, 657–662.
- 22B. M. Pecson, S. C. Triolo, S. Olivieri, E. C. Chen, A. N. Pisarenko, C.-C. Yang, A. Olivieri, C. N. Haas, R. S. Trussell and R. R. Trussell, Reliability of pathogen control in direct potable reuse: Performance evaluation and QMRA of a full-scale 1 MGD advanced treatment train, *Water Research*, 2017, **122**, 258–268.
- 23B. Pecson, A. Kaufmann, D. Gerrity, C. N. Haas, E. Seto, N. J. Ashbolt, T. Slifko, E. Darby and A. Olivieri, Science-based pathogen treatment requirements for direct potable reuse, *Environmental Science: Water Research & Technology*, 2023, **9**, 3377-3390, DOI:10.1039/D3EW00362K.
- 24C. Remy, W. Seis, U. Miehe, J. Orsoni and J. Bortoli, Risk management and environmental benefits of a prospective system for indirect potable reuse of municipal wastewater in France, *Water Supply*, 2019, **19**, 1533–1540.
- 25W. Seis, P. Rouault and G. Medema, Addressing and reducing parameter uncertainty in quantitative microbial risk assessment by incorporating external information via Bayesian hierarchical modeling, *Water Research*, 2020, **185**, 116202.
- 26J. A. Soller, S. E. Eftim, I. Warren and S. P. Nappier, Evaluation of microbiological risks associated with direct potable reuse, *Microbial Risk Analysis*, 2017, **5**, 3–14.
- 27J. A. Soller, S. E. Eftim and S. P. Nappier, Direct potable reuse microbial risk assessment methodology: Sensitivity analysis and application to State log credit allocations, *Water Research*, 2018, **128**, 286–292.
- 28J. A. Soller, S. E. Eftim and S. P. Nappier, Comparison of Predicted Microbiological Human Health Risks Associated with de Facto, Indirect, and Direct Potable Water Reuse, *Environ Sci Technol*, 2019, **53**, 13382–13389.
- 29H. Tanaka, T. Asano, E. D. Schroeder and G. Tchobanoglous, Estimating the safety of wastewater reclamation and reuse using enteric virus monitoring data, *Water Environment Research*, 1998, **70**, 39–51.

30 V. Zhiteneva, G. Carvajal, O. Shehata, U. Hübner and J. E. Drewes, Quantitative microbial risk assessment of a non-membrane based indirect potable water reuse system using Bayesian networks, *Sci Total Environ*, 2021, **780**, 146462.
